# Supplementary material
Source: PubMed Central journal article supplement (PMC4851738)
Supplement: NIHMS744047-supplement-supp_info.pdf [file NIHMS744047-supplement-supp_info.pdf]

## **Supplementary Discussion**

### **Detection limit of existing methods for identifying Cas9-induced genome-wide off-target effects**

Various methods have been described for identifying the genome-wide off-target effects of CRISPR-Cas9 nucleases. These approaches include GUIDE-seq<sup>1</sup>, Digenome-seq<sup>2</sup>, integration-deficient lentivirus capture<sup>3,4</sup>, high-throughput genome-wide translocation sequencing<sup>5</sup>, and breaks labeling, enrichment on streptavidin and next-generation sequencing (**BLESS**)<sup>6,7</sup>. Some of these methods possess the capability to identify sites modified at or below frequencies of 0.1%. However, to our knowledge, no method described to date has been shown to identify sites that are modified with lower frequencies in cells, and it can be challenging to confirm whether alterations below 0.1% frequency are *bona fide* nuclease-induced changes due to the error rate associated with existing deep sequencing methodologies. As the sensitivities of genome-wide methods for detecting off-targets improve, it will be interesting to see whether these methods might unveil any lower frequency off-target sites for wild-type SpCas9, and whether our HF variants might also reduce mutagenesis at these sites as well.

### **Practical considerations for targeting sites of interest with SpCas9-HF1**

SpCas9-HF1 may not be compatible with the common practice of using a G at the 5' end of the gRNA that is mismatched to the protospacer sequence. Our testing of four sgRNAs bearing a 5' G mismatched to its target site showed three of the four had diminished activities with SpCas9-HF1 compared to wild-type SpCas9 (**Extended Data Fig. 7b**), perhaps reflecting the ability of SpCas9-HF1 to better discriminate against a partially mismatched site.

The SpCas9-HF1 variant might also be combined with other mutations that have been shown to alter Cas9 function. For example, we previously described an SpCas9 mutant bearing three amino acid substitutions (D1135V/R1335Q/T1337R, also known as the SpCas9-VQR variant) that recognizes sites with NGAN PAMs (with relative efficiencies for NGAG>NGAT=NGAA>NGAC)<sup>8</sup> and we have also recently identified a quadruple SpCas9 mutant (D1135V/G1218R/R1335Q/T1337R, which we refer to as the SpCas9-VRQR variant) that has improved activities relative to the VQR variant on sites with NGAH (H = A, C, or T) PAMs (**Extended Data Fig. 8a**). We introduced the four mutations (N497A/R661A/Q695A/Q926A) from SpCas9-HF1 into SpCas9-VQR and SpCas9-VRQR to create SpCas9-VQR-HF1 and SpCas9-VRQR-HF1, respectively. Both HF versions of these nucleases show on-target activities comparable (i.e., 70% or more) to their non-HF counterparts with five of eight sgRNAs targeted to the EGFP reporter gene and with seven of eight sgRNAs targeted to endogenous human gene sites (**Extended Data Figs. 8b-8d**). It will be of interest in future experiments to characterize the genome-wide specificities of these variants with altered PAM recognition.

SpCas9-HF1 retains robust on-target activities, inducing mutagenesis at frequencies comparable to that observed with wild-type SpCas9 with ~85% of sgRNAs we tested. It will be important in future studies to define the parameters that distinguish sgRNAs active with SpCas9-HF1 from the minority that are inactive, as is currently being done in ongoing studies to understand properties of sgRNAs that function efficiently with wild-type SpCas9<sup>9-12</sup>.

### **Potential mechanisms to explain improved specificity of the SpCas9-HF1 variant**

Based on available crystal structures of SpCas9<sup>13-15</sup>, we initially targeted alanine substitutions to residues N497, R661, Q695, and Q926 as a way to decrease non-specific binding to the target DNA strand. In general, our results showed that increasing the number of alanine substitutions decreased the modification rates observed with mismatched sgRNAs (a surrogate for mismatched off-target sites) in our initial EGFP modification screen using a single target site (**Fig. 1b**). However, our results also show that certain combinations of the same number of these substitutions led to larger decreases in activities with mismatched sgRNAs than others. For example, among the four different doubly substituted SpCas9 variants (**Fig. 1b**), Q695A/Q926A showed the lowest frequencies of modification when using mismatched sgRNAs. The addition of R661A to Q695A/Q926A led to a complete loss of activities with mismatched

sgRNAs, while the addition of N497A to Q695A/Q926A led to a smaller loss relative to R661A (**Fig. 1b**). N497 and R661 make hydrogen bonds to the same DNA phosphate group, suggesting that R661 may play an additional role that somehow affects SpCas9 activity with mismatched sgRNAs. While N497, R661, and Q926 all sit in the minor groove of the sgRNA:DNA complex<sup>13,14</sup>, R661 and Q926 lie deeper in the minor groove and therefore one can speculate that these residues might be able to stabilize a mispaired sgRNA:DNA duplex. Q695, which is solvent exposed, also appears to be in a position where it might be able to stabilize the target DNA in a mispaired sgRNA:DNA duplex.

Alternatively, a recent mechanistic study suggests that SpCas9 may adopt a partially active conformation, capable of binding and interacting with a subsequence of the target DNA but not cleaving it, prior to adopting a final cleavage-active conformation<sup>16</sup>. According to this model, conformational changes in the HNH domain are communicated to the RuvC domain through a two helix linker (that contains Q926<sup>16</sup>), thereby activating the RuvC domain for cleavage. Mutations in the two-helix linker that disrupt the helix also block RuvC cleavage activity, while alanine substitutions in the linker restore RuvC activity<sup>16</sup>. Q926 lies near the N-terminus of the second helix in the two-helix linker, and we therefore speculate that Q926A might alter the stability of this helix (alanines generally stabilize alpha helices<sup>17,18</sup>). Therefore, it is possible that SpCas9-HF1, at least partially through alanine substitution at Q926, alters the cleavage activation mechanism when the sgRNA-SpCas9-HF1 complex is bound to mismatched off-target sequences.

## References:

1. Tsai, S.Q. et al. GUIDE-seq enables genome-wide profiling of off-target cleavage by CRISPR-Cas nucleases. *Nat Biotechnol* **33**, 187-197 (2015).
2. Kim, D. et al. Digenome-seq: genome-wide profiling of CRISPR-Cas9 off-target effects in human cells. *Nat Methods* **12**, 237-243, 231 p following 243 (2015).
3. Wang, X. et al. Unbiased detection of off-target cleavage by CRISPR-Cas9 and TALENs using integrase-defective lentiviral vectors. *Nat Biotechnol* **33**, 175-178 (2015).
4. Gabriel, R. et al. An unbiased genome-wide analysis of zinc-finger nuclease specificity. *Nat Biotechnol* **29**, 816-823 (2011).
5. Frock, R.L. et al. Genome-wide detection of DNA double-stranded breaks induced by engineered nucleases. *Nat Biotechnol* **33**, 179-186 (2015).
6. Ran, F.A. et al. In vivo genome editing using *Staphylococcus aureus* Cas9. *Nature* **520**, 186-191 (2015).
7. Crosetto, N. et al. Nucleotide-resolution DNA double-strand break mapping by next-generation sequencing. *Nat Methods* **10**, 361-365 (2013).
8. Kleinstiver, B.P. et al. Engineered CRISPR-Cas9 nucleases with altered specificities. *Nature* **523**, 481-485 (2015).
9. Wang, T., Wei, J.J., Sabatini, D.M. & Lander, E.S. Genetic screens in human cells using the CRISPR-Cas9 system. *Science* **343**, 80-84 (2014).
10. Doench, J.G. et al. Rational design of highly active sgRNAs for CRISPR-Cas9-mediated gene inactivation. *Nat Biotechnol* **32**, 1262-1267 (2014).
11. Xu, H. et al. Sequence determinants of improved CRISPR sgRNA design. *Genome Res* **25**, 1147-1157 (2015).
12. Moreno-Mateos, M.A. et al. CRISPRscan: designing highly efficient sgRNAs for CRISPR-Cas9 targeting in vivo. *Nat Methods* **12**, 982-988 (2015).
13. Jinek, M. et al. Structures of Cas9 Endonucleases Reveal RNA-Mediated Conformational Activation. *Science* (2014).
14. Nishimasu, H. et al. Crystal Structure of Cas9 in Complex with Guide RNA and Target DNA. *Cell* (2014).
15. Anders, C., Niewoehner, O., Duerst, A. & Jinek, M. Structural basis of PAM-dependent target DNA recognition by the Cas9 endonuclease. *Nature* **513**, 569-573 (2014).
16. Sternberg, S.H., LaFrance, B., Kaplan, M. & Doudna, J.A. Conformational control of DNA target cleavage by CRISPR-Cas9. *Nature* **527**, 110-113 (2015).

17. Chakrabarty, A., Kortemme, T. & Baldwin, R.L. Helix propensities of the amino acids measured in alanine-based peptides without helix-stabilizing side-chain interactions. *Protein Sci* **3**, 843-852 (1994).
18. Cochran, D.A. & Doig, A.J. Effect of the N2 residue on the stability of the alpha-helix for all 20 amino acids. *Protein Sci* **10**, 1305-1311 (2001).

## Supplementary Sequences – a subset of plasmids used in this study

| Name    | Addgene ID | Description                                                                                        |
|---------|------------|----------------------------------------------------------------------------------------------------|
| JDS246  | 43861      | CMV-T7-humanSpCas9-NLS-3xFLAG                                                                      |
| VP12    | 72247      | CMV-T7-humanSpCas9-HF1(N497A, R661A, Q695A, Q926A)-NLS-3xFLAG                                      |
| MSP2135 | 72248      | CMV-T7-humanSpCas9-HF2(N497A, R661A, Q695A, Q926A, D1135E)-NLS-3xFLAG                              |
| MSP2133 | 72249      | CMV-T7-humanSpCas9-HF4(Y450A, N497A, R661A, Q695A, Q926A)-NLS-3xFLAG                               |
| MSP469  | 65771      | CMV-T7-humanSpCas9-VQR(D1135V, R1335Q, T1337R)-NLS-3xFLAG                                          |
| MSP2440 | 72250      | CMV-T7-humanSpCas9-VQR-HF1(N497A, R661A, Q695A, Q926A, D1135V, R1335Q, T1337R)-NLS-3xFLAG          |
| BPK2797 | 72251      | CMV-T7-humanSpCas9-VRQR(D1135V, G1218R, R1335Q, T1337R)-NLS-3xFLAG                                 |
| MSP2443 | 72252      | CMV-T7-humanSpCas9-VRQR-HF1(N497A, R661A, Q695A, Q926A, D1135V, G1218R, R1335Q, T1337R)-NLS-3xFLAG |
| BPK1520 | 65777      | U6-BsmIbcassette-Sp-sgRNA                                                                          |

### JDS246: CMV-T7-humanSpCas9-NLS-3xFLAG

Human codon optimized *S. pyogenes* Cas9 colored in **blue**, NLS underlined, 3xFLAG tag in **bold**

ATGGATAAAAAAGTATTCTATTGGTTTAGACATCGGCACTAATTCGGTTGGATGGGCTGTCTATAACCGATGAATACAAAGTACCTTCAAAGAAATTTAA  
GGTGTGGGGAACACAGACCGTCATTTCGATTA AAAAAGAATCTTATCGGTGCCCTCTATTTCGATAGTGGCGAAACGGCAGAGGGCGACTCGCCTGA  
AACGAACCGCTCGGAGAAGGTATACACGTGCGAAGAACC GAATATGTTACTTACAAGAAATTTTAGCAATGAGATGGCCAAAGTTGACGATTCTTT  
CTTTCACCGTTTTGGAAGAGTCCCTTCTGTGCGAAGAGGACAAGAACAATGAAACGGCACCCCATCTTTGGAACACATAGTAGATGAGGTGGCATATCA  
TGAAGTACCCAACGATTTATCACCTCAGAAAAAGCTAGTTGACTCAACTGATAAAGCGGACCTGAGGTTAATCTACTTGGCTCTTGCCCATATG  
ATAAAGTCCCGTGGGCACCTTCTCATTGAGGGTGATCTAAATCCGGACAACCTCGGATGTCGACAAACTGTTTCATCCAGTTAGTACAAACCTATAATC  
AGTTGTTTTGAAGAGAACCCTATAAATGCAAGTGGCGTGGATGCGAAGGCTATTCTTAGCGCCCGCCTCTCTAAATCCCGACGGCTAGAAAAACCTGA  
TCGCACAATTACCCGGAGAGAAGAAAAATGGGTTGTCGGTAACCTTATAGCGCTCTCACTAGGCCTGACACCAAATTTTAAAGTGAAGTTCGACTT  
AGCTGAAGATGCCAAATTCAGCTTAGTAAGGACACGTACGATGACGATCTCGACAACTACTGGCACAAATTTGGAGATCAGTATGCGGACTTATT  
TTTGGCTGCCAAAAACCTTAGCGATGCAATCCTCTATCTGACATACTGAGAGTTAATACTGAGATTACCAAGGCCCTTATCCAGTTCATCAATGATC  
AAAAGGTACGATGAACATCACCAAGACTTGACACTTCTCAAGGCCCTAGTCCGTGAGCAACTGCCTGAGAAATATAAGGAAATATTTCTTTCGATCAGT  
CGAAAAACGGGTACGCAAGTTATTTGACGGCGGAGCGAGTCAAGAGGAATTTACAAGTTTATCAAAACCCATATTAGAGAAAGATGGATGGGACG  
GAAGAGTTGCTTGTAAAACTCAATCGGAAGATCTACTGCGAAGCAGCGGACTTTTCGACAACCGGTAGCATTCCACATCAATCCACTTAGGCGAA  
TTGCATGCTATACTTAGAAGGCAGGAGGATTTTTATCCGTTCTCAAAGACAATCGTGAAGGATTGAGAAAACTCAACCTTTCCGATACCTTACTA  
TGTGGGACCGCTGGCCGAGGGAACCTCGGTTTCGATGGATGACAAGAAAGTCCGAAAGAACGATTACTCCATGAAATTTGAGGAAGTTGTCCG  
ATAAAGGTGCGTCACTCAATCGTTTTCGAGAGGATGACAACTTTGACAAGAAATTTACCGAAGGAAAGTATTGCGCTAAGCACAGTTTACTTTA  
CGAGTATTTACAGTGTACAATGAACACTACGAAAGTAAAGTATGCTACTGAGGGCATGCGTAAACCCGCTTTCTAAGCGGAGAACAGAAAGAAC  
AATAGTAGATCTGTTATTCAGACCAACCGCAAAAGTACAGTTAAGCAATTTGAAAGAGGACTACTTTAAGAAAAATTTGAATGCTTCGATTCTGTGCGAG  
ATCTCCGGGTAGAAAGCTGATTTAATGCGTCACTTGGTACGTATCACTGACCTCTAAAGATAATTAAAGATAAGGACTTCTGCGTAAACGAAAGAGA  
ATGAAGATATCTTAGAAGATAGTGTGACTCTTACCCTTTGAAGATCGGGAATGATTGAGGAAAGACTAAAAACATACGCTCACCTGTTCCGA  
CGATAAGGTTATGAAACAGTTAAAGAGGCGTTCGATACGGGCTGGGACGATTTGTCGCGGAAACTTATCAACGGGATAAGAGACAAGCAAAAGT  
GTAAAACTATTCTCGATTTCTAAAGAGCGACGGCTTCGCCAATAGGAACCTTTATGACGCTGATCCATGATGACTTTTAACTTCAAAGAGGATATA  
CAAAAGGCACAGGTTTCCGGAACAGGGGACTCATTGCACGAACATATTGCGAATCTTGTGTTCCGCCAGCCATCAAAAAGGGCATACTCCAGAC  
GACTCAAAGTGTGGATGAGCTAGTTAAGGTTCATGGGACGTGACAAACCGGAAACATTTGTAATCGAGATGGCCGAAAAATCAAACGACTCAGAA  
GGGGCAAAAAAACGTCGAGAGCGGATGAAGAGAATGAAGAGGATTTGCGCGCACTTAAAGAACTGGGCGAGCCAGATCTTAAAGAGCACTTCTGTG  
CCCAATTCGAGAACGAGAACTTACCTCTATTACCTACAAAATGGAAGGGACATGTATGTTGATCAGGAAGTGGACATAAACCGTTTATCTGATTA  
CGAGTTCGATCACATTTGACCCCAATCTTTTGAAGGACGATTTCAATCGACAATAAAGTCTTACAGCTCGGATAAGAACCGGAAAGTAAAGTGA  
CAATGTTCCAAAGCGAGGAGTCTGTAAGAAAAATGAAGAACTTTGCGCGCACTTAAAGAACTGATAACGCAAAAGAAAGTTCGATTTGATTA  
AACTAAAGCTGAGAGGGGTGGCTTGTCTGAACTTGAAGGCCGGATTTTAAACGTCAGCTCGTGGAAACCCGCCAAATCAAAAAGCATGTTGC  
ACAGATACTAGATTTCCGAAATGAATACGAAATACGACGAGAACGATAAGCTGATTTCGGGAAGTCAAAGTAACTCTTTAAAGTCAAAAATTTGGTGTG  
GACTTCAGAAAGGATTTTCAATTTCTATAAAGTTAGGGAGATAAAATAACTACCACCATGCGCACGACGCTTATCTTAAAGTCCGTCGTAGGGACCGCAC  
TCATTAAGAAATACCCGAAGCTAGAAAGTGAAGTTGTGATGTTGATTACAAAGTTTATGACGTCGTAAGATGATCGCGAAAAGCGAACAGGAGAT  
AGGCAAGGCTACAGCCAAATCTCTTTTATTCTAACATTAATGAATTTCTTAAAGACGGAATCACTCTGGCAACCGGAGAGATACGCAACGACCT  
TTAATTTGAAACCAATGGGGAGACAGGTGAAATCGTATGGGATAAGGGCCGGACTTCGCGACGGTGAGAAAAAGTTTGTCCATGCCCAAGTCAA  
CATAGTAAAGAAACTGAGGTGCAGACCGGAGGTTTTCAAAGGAATCGATTCTTCAAAGAAAGGATAGTGATAAGCTCATCGCTCGTAAAAAGGA  
CTGGGACCCGAAAAAGTACGGTGGCTTCGATAGCCCTACAGTTGCCTATTCTGTCCATGATAGTGGCAAAAGTTGAGAAAGGAAAAATCAAAGAACT  
GAAGTCAGTCAAAGAATTTAGGGGATAACGATTATGAGAGCGCTCGTCTTTTGAAGAAACCCCATCGACTTCTTGGGGGAAAGGTTACAAGGA  
AGTAAAAAGGATCTCATAATTAACCTACCAAGTATAGTCTGTTTGAAGTTAGAAAAATGGCCGAAAAACGGATGTTGGCTAGCGCCGGAGAGCTTCAA  
AAGGGGAACGAACTCGCACTACCGTCTAAATACGTGAATTTCTGTATTTAGGCTCCATACGAGAAAGTTGAAAGGTTCACTGAAAGTAAACGAA  
CAGAAGCAACTTTTGTGAGCAGCACAAACATTATCTCGACGAAATCATAGCAAAATTTGGAATTCAGTAAGAGAGTCACTCTGACTGATGCCA  
ATCTGGACAAGTATTAAAGCGCATACAACAAGCACAGGGATAAACCCATACGTGAGCAGGGCGAAAAATTTATCCATTTGTTACTTACCACCT  
CGGCGCTCCAGCCGATTCAGACTTTTTGACACAACGATAGATCCGAAACGATACACTTCTACCAAGGAGGTGCTAGACGCGACACTGATTCACCA  
ATCCATACGGGATTTAATAAGACTCGGATAGATTTGTCACAGTCTGGGGTGGGACTCCCAAGAAAGAGGAAAAAGTCTCGAGCGACTACA  
AAGACCATGACGGTGTATTAAAGATCATGACATCGATTACAAGGATGACGATCAAGTGA

### VP12: CMV-T7-humanSpCas9-HF1(N497A, R661A, Q695A, Q926A)-NLS-3xFLAG

Human codon optimized *S. pyogenes* Cas9 colored in **blue**, modified codons in **red**, NLS underlined, 3xFLAG tag in **bold**

ATGGATAAAAAAGTATTCTATTGGTTTAGACATCGGCACTAATTCGGTTGGATGGGCTGTCTATAACCGATGAATACAAAGTACCTTCAAAGAAATTTAA  
GGTGTGGGGAACACAGACCGTCATTTCGATTA AAAAAGAATCTTATCGGTGCCCTCTATTTCGATAGTGGCGAAACGGCAGAGGGCGACTCGCCTGA  
AACGAACCGCTCGGAGAAGGTATACACGTGCGAAGAACC GAATATGTTACTTACAAGAAATTTTAGCAATGAGATGGCCAAAGTTGACGATTCTTT

CTTTCACCGTTTTGAAGAGTCCCTTCCCTGTGCGAAGAGGACAAGAAACATGAACGGCACCCCATCTTTGGAACATAGTAGATGAGGTGGCATTATCA  
TGAAAAGTACCCCAACGATTTATCACCTCAGAAAAAGCTAGTTGACTCAACTGATAAAGCGGACCTGAGGTTAATCTACTTGGCTCTTGCCCATATG  
ATAAAGTTCCGTTGGGCACTTTCTCATTGAGGGTGATCTAAATCCGGACAACTCGGATGTCGACAAACTGTTTCATCCAGTTAGTACAAAACCTATAATC  
AGTTGTTTGAAGAGAACCCTATAAATGCAAGTGGCGTGGATGCGAAGGCTATTCTTAGCGCCCGCCTCTCTAAATCCCGACGGCTAGAAAACCTGA  
TCGCACAATTACCCGGAGAGAAGAAAAAGGGTGTTCGGTAACCTTATAGCCTCTCACTAGGCCTGACACCAAAATTTAAGTGAACCTCGACTT  
AGCTGAAGTATGCCAAATAGTAAAGGACACGTACGATGACGATCTCGACAACTACTGGCACAAATTTGAGATGAGATGCGGCACTTATT  
TTTGGCTGCCAAAACCTTAGCGATGCAATCCTCCTATCTGACATACTGAGAGTTAATACTGAGATTACCAAGGCGCCGTTATCCGCTCAATGATC  
AAAAGGTACGATGAACATCACCAAGACTTGACACTTCTCAAGGCCCTAGTCCGTCAGCAACTGCCTGAGAAAATAAAGGAAATATTCTTTGATCAGT  
CGAAAAACGGGTACGCAAGTTATATTGACGGCGGAGCGGATCAAGAGGAATTTACAAGTTTTATCAAACCCATATTAGAGAAGATGATGGGACG  
GAAGAGTTGCTTGTAAAACCTCAATCGCGAAGATCTACTGCGAAAGCAGCGGACTTTGCGAACCGGTAGCATTCCACATCAAACTCACTTAGGCGAA  
TTGCATGCTATACTTAGAAGGCAAGGAGGATTTTTATCCGTTCTCAAAGACAATCGTGAAAAGATTGAGAAAATCCTAACCTTTCCGATACCTTACTA  
TGTGGGACCCTGGCCCGAGGGAACCTCGGTTTCGATGGATGACAAGAAAGTCCGAAAGAACGATTACTCCCTGGAAATTTGAGGAAAGTTGTCG  
ATAAAGGTTGCGTACGCTCAATCGTTTCATCGAGAGGATGACC**GCC**TTTGACAAGAATTTACCGAACGAAAAAGATTGCCTAAGCACAGTTTACTTTA  
CGAGATTTTACAGTGTACAATGAACCTCACGAAAGTTAAGTATGTCAGTGAAGGATCGGTAACCCCGCTTTCTAAGCGGAGAACAGAAAGAAC  
AATAGTAGATCTGTTATTCAAGAACCCGAAAGTGACAGTTAAGCAATTTGAAAGAGGACTACTTTAAGAAAAATTTAAGAAATTTGAGATCTGCTGAG  
ATCTCCGGGTAGAAAGATCGATTTAATCGCTCACTTGGTACGTATCATGACCTCCTAAAGATAATTAAGATAAAGGACTTCTGGATAACGAAGAGA  
ATGAAGATATCTTAGAAGATATAGTGTGACTCTTACCCTCTTTGAAGATCGGGAATGATTGAGGAAAGACTAAAAACATACGCTCACCTGTTTCA  
CGATAAGTTTAAAGACAGTTAAAGAGCGCTCGCTATACGGGACTTGGGGA**GCC**TTGTCCGGGAACTTATCAACGGGTAAGAAGATGATGCTGCGAG  
GTAAAACCTATTCTCGATTTTCTAAAGAGCGACGGCTTCGCCAATAGGAACTTTAT**GCCCT**GATCCATGATGACTCTTTAACCTTCAAAGAGGATAT  
ACAAAAGGCACAGGTTTCCGGACAAGGGGACTCATTGCACGAACATATTCGGAATCTTGCTGGTTCCGACCCATCAAAAAGGGCATACTCCAGA  
CAGTCAAAGTAGTGGATGAGTAAAGGTCAAGGTCAAGGACGTCACAACCCGAAACATTTAATCGAGATGGCAGCGGAAAAATCGAAGATGATGCG  
AGGGGCAAAAAAACAGTCGAGAGCGGATGAAGAGAATAGAAGAGGGTATTAAGAAGTGGGCGAGCCAGATCTTAAGAGGAGCATCCTGTGAAAAAT  
ACCCAATTCGAGAAGCAGAAACCTTACCTCTATTACCTACAAAATGGAAGGGACATGTATGTTGATCAGGAAGTGGACATAAACCGGTTTATCTGATT  
ACGACGTCGATCACATTGTACCCCACTTCTTTTGAAGGACTTCAATCGACAATTAAGTGCCTTACACGCTCGGATAAGAAGCCGAAAGGAAAAAGT  
ACAATGTTCCAAGCGAGGAAAGTCGTAAGAAAAATGAAGAAGTATTGGCGGACGCTCCTAAATGCGAAACTGATAACGCAAGAAAGTTTCGATAACT  
TAACTAAAGCTGAGAGGGTGGCTTGTCTGAACCTGACAAGGCCGGATTTAATAACCTCAGCTCGTGGAACCCCG**GCC**ATCACAAAAGCATGTTG  
CGCAGATACTAGTTCCCGAATGAATACGAAATACGACGAACTGACGTAAGCTGATTCGGGAAATCAAAATCACTTTAAGGAAATTTGAGGAAATGTTG  
GGACTTCAGAAAGGATTTCAATTTCTATAAAGTTAGGGAGATAAATAACTACCACCATGCGCACGACGCTTATCTTAATGCCGTGCTAGGGACCGCA  
CTCATTAAGAAATACCCGAAGCTAGAAAAGTGGTGTGATGTTGATGATTACAAAGTTTATGACGTCGTAAGATGATGCGGAAAGCGAACAGGAG  
ATAGGCAAGCTACGAAAGTAAAGTAACTTCTTTTAACTAACATTTGAATTTCTTAAAGACGAAATCACTCTGGCAAAAGTACGCAAAAGTACGCAAAAGC  
CTTTAATTTGAAACCAATGGGGAGACAGGTGAAATCGTATGGGATAAGGGCCGGGACTTCGCGACGGTGAGAAAAGTTTTGTCCATGCCCAAGTC  
AACATAGTAAAGAAACTGAGGTGACAGCGGAGGGTTTTCAAGGAATCGACTTCTCCAAAAGGAATAGTGATAAGCTCATCGCTCGTATAAAGAG  
GACTGGGACCCGAAAAAGTACGGTGGCTTCGATAGCCCTAGCTTGCCTATTTCTGCTAGTAGTGGCAAAAGTTGAGAAAGGAAATCAAAGAAA  
CTGAAGTCAGTCAAGAATTATTGGGATAACGATTATGGAGCGCTCGTCTTTGAAAAGAACCCCATCGACTTCTTGAAGCGAAAGGTTACAAG  
GAAGTAAAAAAGGATCTCATAATTAACCTACCAAAATGATAGTCTGTTTGAAGTTAGAAAATGGCCGAAAACGGATGTTGGTACGCGCGGAGAGCTT  
CAAAAGGGAAACGAACTCGCACTACCGTCTAAATACGTGAATTTCTGCTATTTAGCCTCCCATACGAAAGTTGAAAAGGTTCACTGAAGATAAC  
GAACAGAAGCACTTTTGTGAGCAGCACAAACATTATCTCGACGAATCATAGAGCAAATTTCCGAATTCAGTAAGAGAGTCACTCTAGCTGATG  
CCAATCTGGACAAAGTATTAAGCGCATACAACAGCACAGGGATAAACCCATACGTCGAGCAGGCGGAAAAATATTACCTTTGTTACTCTTACCAA  
CTCTGGCGCTCCAGCCGATTTCAAGTATTTTGAACAACGATAGATCGCAAAACGATACACTTCTACCAAGGAGGTCTAGACGACGACTGATTCA  
CCAATCCATCAGGGATATATGAAACTCGGATAGATTTGTACAGCTTGGGGTGACGGATCC**CCCA**GAAGAAGAGGAAAGTCTCGAGC**GACT**  
**ACA**AGACCATGACGGT**GATTATA**AGAT**CATGACATCGATTACA**AGGAT**GACGATGACA**AGT**GTA**

**MSP2135: CMV-T7-humanSpCas9-HF2(N497A, R661A, Q695A, Q926A, D1135E)-NLS-3xFLAG**  
**Human codon optimized *S. pyogenes* Cas9 colored in blue, modified codons in red, NLS underlined,**  
**3xFLAG tag in bold**

ATGGATAAAAAGTATTCTATTGGTTTAGACATCGGCACTAATCCGTTGGATGGGCTGTCATAACCCGATGAATACAAGTACCTTCAAAGAAATTTAA  
GGTGTGGGGAACACAGACCGCTCATTCCGATTAAGAAGATCTTATCCGTTGCCCTCCTATTTCGATAGTGCCGAAACGGCAGGCGACTCGCCTGA  
AACGAACCCTCGGAAAGGTTATACACGTCGCAAGAACCGAATATGTTACTTACAAGAAATTTTAGCAATGAGATGGCAGAAAGTGTGACGATCTTT  
CTTTCACCGTTTTGAAGAGTCCCTTCCCTGTGCGAAGAGGACAAGAAACATGAACCGCACCCCATCTTTGGAACATAGTAGATGAGGTGGCATTATCA  
TGAAAAGTACCCCAACGATTTATCACCTCAGAAAAAGCTAGTTGACTCAACTGATAAAGCGGACCTGAGGTTAATCTACTTGGCTCTTGCCCATATG  
ATAAAGTTCCGTTGGGCACTTTTCACTTGAAGGGTATCTAAATCCGGACAACTCGGATGTCGACAAACTGTTTCATCCAGTTAGTACAAAACCTATAATC  
AGTTGTTTGAAGAGAACCCTATAAATGCAAGTGGCGTGGATGCGAAGGCTATTCTTAGCGCCCGCCTCTCTAAATCCCGACGGCTAGAAAACCTGA  
TCGCACAATTACCCGGAGAGAAGAAAAAGGGTGTTCGGTAACCTTATAGCCTCTCACTAGGCCTGACACCAAAATTTAAGTGAACCTCGACTT  
AGCTGAAGTATGCCAAATAGTAAAGGACACGTACGATGACGATCTCGACAACTACTGGCACAAATTTGAGATGAGATGCGGCACTTATT  
TTTGGCTGCCAAAACCTTAGCGATGCAATCCTCCTATCTGACATACTGAGAGTTAATACTGAGATTACCAAGGCGCCGTTATCCGCTCAATGATC  
AAAAGGTACGATGAACATCACCAAGACTTGACACTTCTCAAGGCCCTAGTCCGTCAGCAACTGCCTGAGAAAATAAAGGAAATATTCTTTGATCAGT  
CGAAAAACGGGTACGCAAGTTATATTGACGGCGGAGCGGATCAAGAGGAATTTACAAGTTTTATCAAACCCATATTAGAGAAGATGATGGGACG  
GAAGAGTTGCTTGTAAAACCTCAATCGCGAAGATCTACTGCGAAAGCAGCGGACTTTGCGAACCGGTAGCATTCCACATCAAACTCACTTAGGCGAA  
TTGCATGCTATACTTAGAAGGCAAGGAGGATTTTTATCCGTTCTCAAAGACAATCGTGAAAAGATTGAGAAAATCCTAACCTTTCCGATACCTTACTA  
TGTGGGACCCTGGCCCGAGGGAACCTCGGTTTCGATGGATGACAAGAAAGTCCGAAAGAACGATTACTCCCTGGAAATTTGAGGAAAGTTGTCG  
ATAAAGGTTGCGTACGCTCAATCGTTTCATCGAGAGGATGACC**GCC**TTTGACAAGAATTTACCGAACGAAAAAGATTGCCTAAGCACAGTTTACTTTA  
CGAGTATTTACAGTGTACAATGAACCTCACGAAAGTTAAGTATGTCAGTGAAGGATCGGTAACCCCGCTTTCTAAGCGGAGAACAGAAAGAAAGC  
AATAGTAGATCTGTTATTCAAGACCAACCGCAAGTGACAGTTAAGCAATTTGAAAGAGGACTACTTTAAGAAAAATTTGAATGCTTCCGATCTGTCGAG  
ATCTCCGGGTAGAAAGATCGATTTAATCGCTCACTTGGTACGTATCATGACCTCCTAAAGATAATTAAGATAAAGGACTTCTGGATAACGAAGAGA  
ATGAAGATATCTTAGAAGATATAGTGTGACTCTTACCCTCTTTGAAGATCGGGAATGATTGAGGAAAGACTAAAAACATACGCTCACCTGTTTCA  
CGATAAGTTTAAAGACAGTTAAAGAGCGCTCGCTATACGGGACTTGGGGA**GCC**TTGTCCGGGAACTTATCAACGGGTAAGAAGATGATGCGGAAAGT  
GTAAAACCTATTCTCGATTTTCTAAAGAGCGACGGCTTCGCCAATAGGAACTTTAT**GCCCT**GATCCATGATGACTCTTTAACCTTCAAAGAGGATAT  
ACAAAAGGCACAGGTTTCCGGACAAGGGGACTCATTGCACGAACATATTCGGAATCTTGCTGGTTCCGACCCATCAAAAAGGGCATACTCCAGA  
CAGTCAAAGTAGTGGATGAGTAAAGGTCAAGGTCAAGGACGTCACAACCCGAAACATTTAATCGAGATGGCAGCGGAAATCAAACGACTACGACA  
AGGGGCAAAAAAACAGTCGAGAGCGGATGAAGAGAATAGAAGAGGGTATTAAGAAGTGGGCGAGCCAGATCTTAAGAGGAGCATCCTGTGAAAAAT  
ACCCAATTCGAGAAGCAGAAACCTTACCTCTATTACCTACAAAATGGAAGGGACATGTATGTTGATCAGGAAGTGGACATAAACCGGTTTATCTGATT  
ACGACGTCGATCACATTGTACCCCACTTCTTTTGAAGGACTTCAATCGACAATTAAGTGCCTTACACGCTCGGATAAGAAGCCGAAAGGAAAAAGT  
ACAATGTTCCAAGCGAGGAAAGTCGTAAGAAAAATGAAGAAGTATTGGCGGACGCTCCTAAATGCGAAACTGATAACGCAAGAAAGTTTCGATAACT  
TAACTAAAGCTGAGAGGGTGGCTTGTCTGAACCTGACAAGGCCGGATTTAATAACCTCAGCTCGTGGAACCCCG**GCC**ATCACAAAAGCATGTTG  
CGCAGATACTAGATTCCCGAATGAATACGAAATACGACGAAAGCAATGACTGATTTCGGGAAAGTCAAAAGTAACTCTTTAAGGAAATTTGAGGAAATGTTG  
GGACTTCAGAAAGGATTTCAATTTCTATAAAGTTAGGGAGATAAATAACTACCACCATGCGCACGACGCTTATCTTAATGCCGTGCTAGGGACCGCA  
CTCATTAAGAAATACCCGAAGCTAGAAAAGTGGTGTGATGTTGATGATTACAAAGTTTATGACGTCGTAAGATGATGCGGAAAGCGAACAGGAG  
ATAGGCAAGCTACAGCCAAATCTTTTAACTAACATTTGAAGTAACTTTTAAAGACGAAATCACTCTGGCAAAAGTACGCAAAAGTACCAACAGCAG  
CTTTAATTTGAAACCAATGGGGAGACAGGTGAAATCGTATGGGATAAGGGCCGGGACTTCGCGACGGTGAGAAAAGTTTTGTCCATGCCCAAGTC

AACATAGTAAAGAAAATGAGGTGCAGACCGGAGGGTTTTCAAAGGAATCGATTCTTCCAAAAGGAATAGTGATAAGCTCATCGCTCGTAAAAAG  
GACTGGGACCCGAAAAGTACGGTGGCTTCGAGAGCCCTACAGTTGCCTATTCTGTCTAGTAGTGGCAAAAGTTGAGAAGGGAAAATCCAAGAA  
ACTGAAGTCAGTCAAAGAAATTTGGGGATAACGATTATGGAGCGCTCGTCTTTTAAAAAGAACCCCATCGACTTCTTTGAGGGCAAAGTTACAA  
GGAAGTAAAAAAGGATCTCATAATTAACCTACCAAAGTATAGTCTGTTTGAAGTTAGAAAATGGCCGAAAACGGATGTTGGCTAGCGCCGAGAGCT  
TCAAAAAGGGGAACGAACCTCCGACTACCGTCTAAATACGTGAATTCCTGTATTAGCGTCCCATTACGAGAAGTTGAAAGGTTACCTGAAGATAAC  
GAACAGAAGCAACTTTTTTTGGAGCAGCAACAACTATCTCGAGCAAAATCATAGAGCAAAATTTCCGAAATCAGTAAGAGAGTCTCCTAGCTGATG  
CCAATCTGGACAAAGTATTAAAGCGCATACAACAAGCACAGGGATAAACCCTACGTGAGCAGCGGAAAAATATTATCCATTTGTTTACTCTTACCAA  
CCTCGGCGCTCCAGCCGATTCAAGTATTTTGCACAACAGATAGATCGCAACAGTACACTTCTACCAAGGAGGTGCTAGACGGGACACTGATTCA  
CCAATCCATCAGCGGATTATATGAAACTCGGATAGATTTGTACAGCTTGGGGGTGACGGATCCCAAGAAAGAGGAAAAGTCTCGAGCGACT  
ACAAAGACCATGACGGTGATTATAAGATCATGACATCGATTACAAGGATGACGATGACAAGTGA

**MSP2133:** CMV-T7-humanSpCas9-HF4(Y450A, N497A, R661A, Q695A, Q926A)-NLS-3xFLAG  
Human codon optimized *S. pyogenes* Cas9 colored in blue, modified codons in red, NLS underlined,  
3xFLAG tag in bold

ATGGATAAAAAAGTATTCTATTGGTTTACACATCGGCACTAATCCGTTGGATGGGCTGTCCATAACCGATGAATACAAAGTACCTTCAAAGAAATTTAA  
GGTGTGGGGAAACACAGACCGCTCATTTCGATTAATAAGAAATCTTATCGGTGCCCTCCTATTTCGATAGTGGCGAAAACGGCAGAGGGCAGCTCGCCTGA  
AACGAACCGCTCGGAGAAGGTATACACGTCGCAAGAACCGAATATGTTACTTACAAGAAAATTTTAGCAATGAGATGGCCAAAAGTTGACGATCTTT  
CTTTCACCGTTTGAAGAGTCCCTTCTTGTGCAAGAGGACAAGAAACATGAACGGCACCCCATCTTTGGAACATAGTAGATGAGGTGGCATATCA  
TGAAAAGTACCCAACGATTTATCACCTCAGAAAAAGACTAGTTGACTCAACTGATAAAGCGGACCTGAGGTTAATCTACTTGGCTCTTGCCCATATG  
ATAAAGTCCGTTGGCAGCTTCTCAATTGAGGGTATCTAAATCCGGCAACTCGGATGTCGACAACTGTTCCATCCAGTTAGTACAACTATAATC  
AGTTGTTTGAAGAGAACCTATAAATGCAAGTGGCGTGGATGCGAAGGCTATTCTAGCGCCCGCTCTCTAAATCCCGACCGCTAGAAAACCTGA  
TCGCACAATTACCCGGAGAGAAAAGAAATGGGTTGTTCCGTAACCTTATAGCGCTCTCACTAGGCCGTGACACCAAAATTTTAAAGTGAAGTTCGACT  
AGCTGAAGATGCCAAATGTCAGCTTAGTAAGGACAGTACGATGACGATCTGACAACTACTGGCACAATTTGGAGATCAGTATGCGGACTTATT  
TTTGGTGCACAAAACCTTAGCGATGCAATCCTCTATCTGACATAGTGAAGTTAACTAGATTAACCTAGAGATTACCAAGGCGCGTTTCCCGTCAATGATC  
AAAAGGTACGATGAACATCACCAGACTTTGACACTTCTCAAGCCCGTACTCCGTCAGCAACTGCCTGAGAAAATATAAGGAAATTTCTTTGATCAGT  
CGAAAAACGGGTACGCAAGTTATTTGACGCGGAGCGAAGCAAGGAAATTTCAACAGTTTATAGAAAAGATGATGATGGGACTTATT  
GAAAGTGTGCTTGTAAAACCTAATCGCAAGATCTACTGCAAAAGCAGCGGACTTTGCAACCGGTAGCATTCCACATCAAACTCCACTTAGGCGAA  
TTGCATGCTACTTGAAGGCGAGGAGGATTTTATCCGTTCTCAAGACCAATCGTGAAGAAAGATTGAGAAAATCCTAACCTTCCGATACCTGCT  
ATGTGGGACCCCTGGCCGAGGAACTCTCGGTTCCGATGGATGACAAGAAAGTCCGAAGAACGATTACTCCCTGGAATTTTGAAGAAAGTTGTC  
GATAAAGGTGCGTCAACTCAATCGTTTATCGAGAGGATGACCGCTTTGACAAGAAATTTACCGAACGAAAAGATTGCTTAAGCACAGTTTACTTT  
ACGAGTATTTACAGTGTACAATGAACCTCACGAAAGTTAAGTATGTACTGAGGGCATGCGTAAACCCGCTTTCTAAGCGGAGAACAGAAAAG  
CAATAGTAGATCTGTTATCAAGACCAACCGCAAAGTGACAGTTAAGCAATTTGAAGAGGACTACTTAAAGAAAATGAATGCTTCGATTTCTGCGA  
GATCTCCGCGGTAGAAGATCGATTTAATGCGTCACTGGTACTGATCATGACCTCTAAAGATAAATAAGATAAAGGACTTCCCTGGATAACGAAAG  
AATGAAGATATCTAGAAGATATAGTGTGACTTACCCTCTTTGAAGATCGGGAAATGATTGAGGAAAGACTAAAAACATACGCTCACCTGTTCCG  
ACGATAAGGTTATGAACAGTTAAAGAGGGCTCGCTATACGGGCTGGGAAGCTTGTGCGGAAACTTATCAACGGGATAAGAGACAAGCAAAGT  
GGTAAAACCTATTCGATTTTCTAAAGAGCGACGGCTTCGCCAATAGGAACCTTTATCGCTGATCCATGATGACTTTTAACTTCAAAGAGGATA  
TACAAAAGGCACAGGTTTCCGGACAAGGGGACTCATTGCAGCAACATATTGCGAATCTTGTGTTGCGCCAGCCATCAAAAAGGGCATACTCCAGA  
CAGTCAAAGTAGTGGATGAGCTAGTTAAGTTCATGGGACGTCACAACCCGAAAACATTGTAATCGAGATGGCAGCGGAAAATCAACGACTCAGA  
AGGGGCAAAAACAGTGGAGAGCGGATGAAGAGAATAGGAGGTTAATAAGAACTTCCGAGCCAGATCTTAAAGAGAGACTCCTGTGGAAAAT  
ACCCAATTCAGAACGAGAACTTTACCTCTATTACCTACAAAATGGAAGGGACATGTATGTTGATCAGGAACTGGACATAAACCGTTTATCTGATT  
ACGACGTCGATCAGTTACCCCACTCTTTTGAAGGACGATTCAATCGCACTAAAGTCTTACAGCTCGGATAAGAACCGGAGGAAAAGTGTG  
ACAATTTCAAAGCAGGAGGAACTTAAAGAAAATGAAGAACTTTGGCGCAACTCAAAATGCGAAAACGATAAGCAGAAAAGTTTCGATAAAT  
TAACTAAAGCTGAGAGGGGTGGCTTGTGTAACCTTGACAAGCGCGGATTTAATAACGTACGCTCGTGAACCCCGCTCATCAAAAGCATGTTG  
CGCAGATACTAGATTTCCGAATGAATACGAAAATACGACGAGAACGATAAGCTGATTCGGGAAGTCAAAGTAACTACTTTAAAGTCAAATTTGGTGTG  
GGCTTCAGAAAAGTTTCAATTTATAAAGTTAGGGAGATAAATAACTACCACCATGCCAGCAGCCTTATCTTAATGCCCTCGTAGGGACCGCA  
CTCATTAAAGAAATACCCGAAGCTAGAAAAGTGTGTTGTTGATGGTATTACAAAGTTTATGACGTCGTAAGATGATCGCGAAAAGCGCAACAGGAG  
ATAGGCAAGGCTACAGCCAAACTCTTTTATTCTAACATTATGAATTTCTTAAAGACGGAATCACTCTGGCAAACGGAGAGATACGCAACAGCAG  
CTTTAATTTGAAAACCAATGGGGAGCAGGTGAAAATCGTATGGGATAAGGGCCGGGACTTCCGCGAGGTGAGAAAAGTTTGTCCATGCCCAAGTC  
AACATAGTAAAGAAAACCTGAGGTGCAGACCGGAGGGTTTTCAAAGGAATCGATTCTTCCAAAAGGAATAGTGATAAGCTCATCGCTCGTAAAAAG  
GACTGGGACCCGAAAAGTACGGTGGCTTCGATAGCCCTACAGTTGCCTATTCTGTCTAGTAGTGGCAAAAAGTTGAGAAGGGAAAATCCAAGAAA  
CTGAAGTCAGTCAAAGAAATTTTGGGATAACGATTTAGGAGCCCTCGTCTTTTAAAAAGAACCCCATCGACTTCTTTGAGGCGAAAAGTTTACAAG  
GAAGTAAAAAAGGATCTCATAATTAACCTACCAAAGTATAGTCTGTTTGAAGTTAGAAAATGGCCGAAAACGGATGTTGGCTAGCGCCGAGAGCTT  
CAAAAAGGGGAACGAACCTCGCACTACCGTCTAAATACGTGAATTCCTGTATTAGCGTCCCATTACGAGAAGTTGAAAGGTTACCTGAAGATAAC  
GAACAGAAGCAACTTTTTTTGAGCAGCAACAACTATCTCGACGAAATCATAGAGCAAAATTTCCGAAATCAGTAAGAGGATCATCCTAGCTGATG  
CCAATCTGGACAAAGTATTAAAGCGCATACAACAAGCACAGGGATAAACCCTACGTGAGCAGCGGAAAAATATTATCCATTTGTTTACTCTTACCAA  
CCTCGGCGCTCCAGCCGATTCAAGTATTTTGCACAACAGATAGATCGCAACAGTACACTTCTACCAAGGAGGTGCTAGACGGGACACTGATTCA  
CCAATCCATCAGCGGATTATATGAAACTCGGATAGATTTGTACAGCTTGGGGGTGACCGGATCCCAAGAAAGAGGAAAAGTCTCGAGCGACT  
ACAAAGACCATGACGGTGATTATAAGATCATGACATCGATTACAAGGATGACGATGACAAGTGA

**MSP469:** CMV-T7-humanSpCas9-VQR(D1135V, R1335Q, T1337R)-NLS-3xFLAG  
Human codon optimized *S. pyogenes* Cas9 colored in blue, modified codons in red, NLS underlined,  
3xFLAG tag in bold

ATGGATAAAAAAGTATTCTATTGGTTTACACATCGGCACTAATCCGTTGGATGGGCTGTCCATAACCGATGAATACAAAGTACCTTCAAAGAAATTTAA  
GGTGTGGGGAAACACAGACCGCTCATTTCGATTAATAAGAAATCTTATCGGTGCCCTCCTATTTCGATAGTGGCGAAAACGGCAGAGGGCAGCTCGCCTGA  
AACGAACCGCTCGGAGAAGGTATACACGTCGCAAGAACCGAATATGTTACTTACAAGAAAATTTTAGCAATGAGATGGCCAAAAGTTGACGATCTTT  
CTTTCACCGTTTGAAGAGTCCCTTCTTGTGCAAGAGGACAAGAAACATGAACGGCACCCCATCTTTGAAAACATAGTAGATGAGGTGGCATATCA  
TGAAAAGTACCCAACGATTTATCACCTCAGAAAAAGCTAGTTGACTCAACTGATAAAGCGGACCTGAGGTTAATCTACTTGGCTCTTGCCCATATG  
ATAAAGTCCGTTGGCAGCTTCTCAATTGAGGGTATCTAAATCCGGCAACTCGGATGTCGACAACTGTTCCATCCAGTTAGTACAACTATAATC  
AGTTGTTTGAAGAGAACCTATAAATGCAAGTGGCGTGGATGCGAAGGCTATTCTTAGCGCCCGCTCTCTAAATCCCGACCGCTAGAAAACCTGA  
TCGCACAATTACCCGGAGAGAAAAGAAATGGGTTGTTCCGTAACCTTATAGCGCTCTCACTAGGCCGTGACACCAAAATTTTAAAGTGAAGTTCGACT  
AGCTGAAGATGCCAAATGTCAGCTTAGTAAGGACAGTACGATGACGATCTGACAACTACTGGCACAATTTGGAGATCAGTATGCGGACTTATT  
TTTGGTGCACAAAACCTTAGCGATGCAATCCTCTATCTGACATAGTGAAGTTAACTAGATTAACCAAGGCGCGTTTCCCGTCAATGATC  
AAAAGGTGACATGAACATCACCAGACTTTGACACTTCTCAAGCCCGTACTCCGTCAGCAACTGCCTGAGAAAATATAAGGAAATTTCTTTGATCAGT  
CGAAAACCGGGTACGCAAGTTATTTGACGCGGAGCGAGTCAAGGAAATTTCAAGTTTATCAACCCATATTAGAGAAGATGATGATGGGAGC  
GAAGAGTTGCTTGTAAAACCTCAATCGCAAGATCTACTGCAAAAGCAGCGGACTTTGCAACCGGTAGCATTCCACATCAAACTCCACTTAGGCGAA  
TTGCATGCTACTTGAAGGCGAGGAGGATTTTATCCGTTCTCAAGAACATCGTGAAGAAAGTTGAGAAAATCCTAACCTTCCGATACCTTACTA  
TGTGGGACCCCTGGCCGAGGGAACCTCTGGTTGCATGGATGACAAGAAAGTCCGAAGAAACGATTACTCCATGGAATTTTGAAGAAAGTTGTCG







AGGGGCAAAAAACAGTCGAGAGCGGATGAAGAGAATAGAAGAGGGTATTAAGAAGCTGGGCAGCCAGATCTTAAAGGAGCATCCTGTGGAAAAAT  
ACCCAATTGCAGAACGAGAACTTTACCTCTATTACCTACAAAATGGAAGGGACATGTATGTTGATCAGGAACGGACATAAACCGTTTATCTGATT  
ACGACGTCGATCACATTGTACCCCAATCCTTTTTGAAGGACGATTCAATCGACAATAAAGTGCTTACACGCTCGGATAAGAACCAGGGGAAAAAGTG  
ACAATGTTCCAAGCGAGGAAGTCGTAAAGAAAAATGAAGAACTATTGGCGGCAGCTCCTAAATGCGAAACTGATAACGCAAAAGAAAGTTCCGATAACT  
TAACTAAAGCTGAGAGGGGTGGCTTGTCTGAACCTGACAAGGCCGGATTTATTAACGTCAGCTCGTGGAAACCCGCCCATCACAAAGCATGTTG  
CGCAGATACTAGATTCCCGAATGAATACGAAAATACGACGAGAACGATAAGCTGATTCGGGAAGTCAAAGTAATCACTTTAAAGTCAAAAATGGTGTC  
GGACTTCAGAAAGGATTTCAATTCTATAAAGTTAGGGAGATAAATAACTACCACCATGCGCACGACGCTTATCTTAATGCCGTCGTAGGGACCGCA  
CTCATTAAAGAAATACCCGAAGCTAGAAAGTGAGTTTGTGTATGGTGATTACAAAGTTTATGACGTCGTAAGATGATCGCGAAAAGCGAACAGGAG  
ATAGGCAAGGCTACAGCCAATACTCTTTTTATTCTAACATTAAGAATTTCTTAAGACGGAAATCACTCTGGCAAACGGAGAGATACGCAAAACGAC  
CTTAATTGAAACCAATGGGGAGACAGGTGAAATCGTATGGGATAAAGGGCCGGGACTTCGCGACGGTGAGAAAAGTTTTGTCCATGCCCAAGTC  
AACATAGTAAAGAAAAGTGAAGTGCAGACCCGGAGGGTTTTCAAAGGAATCGATTCTTCAAAAAGGAATAGTGATAAGCTCATCGCTCGTAAAAAG  
GACTGGGACCCGAAAAAGTACGGTGGCTTCGTGAGCCCTACAGTTGCCATTCTGTCTAGTAGTGGCAAAAGTTGAGAAGGGAAAAATCCAAGAA  
ACTGAAGTCAGTCAAAGAATTATTGGGGATAACGATTATGGAGCGCTCGCTTTTTGAAAAGAACCCCATCGACTTCCTTGAGGCGAAAGGTTACAA  
GGAAGTAAAAAGGATCTCATAATTAACCTACCAAGTATAGTCTGTTTGTAGTTAGAAAATGGCCGAAAACGGATGTTGGCTAGCGCCAGAGAGCTT  
CAAAAGGGGAACGAACTCGCACTACCGTCTAAATACGTGAATTTCTGTATTTAGCGTCCCATACGAGAAGTTGAAAAGTTTCACTGAAGATAAC  
GAACAGAAGCAACTTTTTGTTGAGCAGCACAAACATTAATCTCGACGAAATCATAGAGCAAATTTCCGAATTAGTAAGAGAGTCACTCTAGCTGATG  
CCAATCTGGACAAAGTATTAAGCGCATACAACAAGCACAGGGATAAACCCATACGTGAGCAGGCGGAAAAATATTATCCATTTGTTTACTCTTACCAA  
CCTCGGGCGCTCCAGCCGATTCAAGTATTTTACACAACGATAGATCGCAAAAGTACAGATCTACCAAGGAGGTGCTAGACGCGGACACTGATTCA  
CCAATCCATCACGGGATTATGAAACTCGGATAGATTTGTACAGCTTGGGGGTGACGGATCCCCCAAGAAGAAGAGGAAAGTCTCGAGCGACT  
ACAAAGACCATGACGGTGATTATAAGATCATGACATCGATTACAAGGATGACGATGACAAGTGA

**BPK1520: U6-BsmBIcassette-Sp-sgRNA**

U6 promoter in green, BsmBI sites underlined, *S. pyogenes* sgRNA colored in purple, U6 terminator

underlined

TGTACAAAAAGCAGGCTTTAAAGGAACCAATTCAGTCGACTGGATCCGTTACCAAGGTCGGGCAGGAAGAGGGCCTATTTCCATGATTCTTCA  
TATTTGCATATACGATACAAGGCTGTTAGAGAGATAATTAGAATTAATTTGACTGTAACACAAAAGATATTAGTACAAAATACGTGACGTAGAAGTA  
ATAATTTCTTGGGTAGTTTTCAGTTTTAAAATTATGTTTTAAAATGGACTATCATATGCTTACCGTAACTTGAAAGTATTTTCGATTTCTGGCTTTATAT  
ATCTTGTGAAAAGGACGAAACCCGGAGACGATTAATGCGTCTCCGTTTTAGAGCTAGAATAGCAAGTTAAAATAAGGCTAGTCCGTTATCAACT  
GAAAAAGTGGCACCGAGTCGGTGCITTTTT
